# Supplementary material for: CENPF/CDK1 Signaling Pathway Enhances the Progression of Adrenocortical Carcinoma by Regulating the G2/M-phase Cell Cycle
Source: Research Square preprint supplement (doi:10.21203/rs.3.rs-1012618/v1), 2021-11-30
Supplement: Supplementary file 1 [file ec24fd2c23923764a9cf8f2f.docx]

**Supplementary Table 3 . Details of ACC studies and associated microarray datasets from GEO database.**

| **GEO Series** | **Contributor(s)** | **Sample** | | **Platform** | **Submission time** | **Country** |
| --- | --- | --- | --- | --- | --- | --- |
| **Tumor** | **Normal** |
| GSE90713 | Farber JM et al, 2016 | 58 | 5 | GPL15207 Affymetrix Human Gene Expression Array | 2016 | USA |
| GSE19750 | Bussey KJ et al, 2010 | 44 | 4 | GPL570 Affymetrix Human Genome U133 Plus 2.0 Array | 2010 | USA |
